# Supplementary material
Source: MDPI journal article supplement (https://www.mdpi.com/1099-4300/17/8/5611)
Supplement: s1 [file s1]

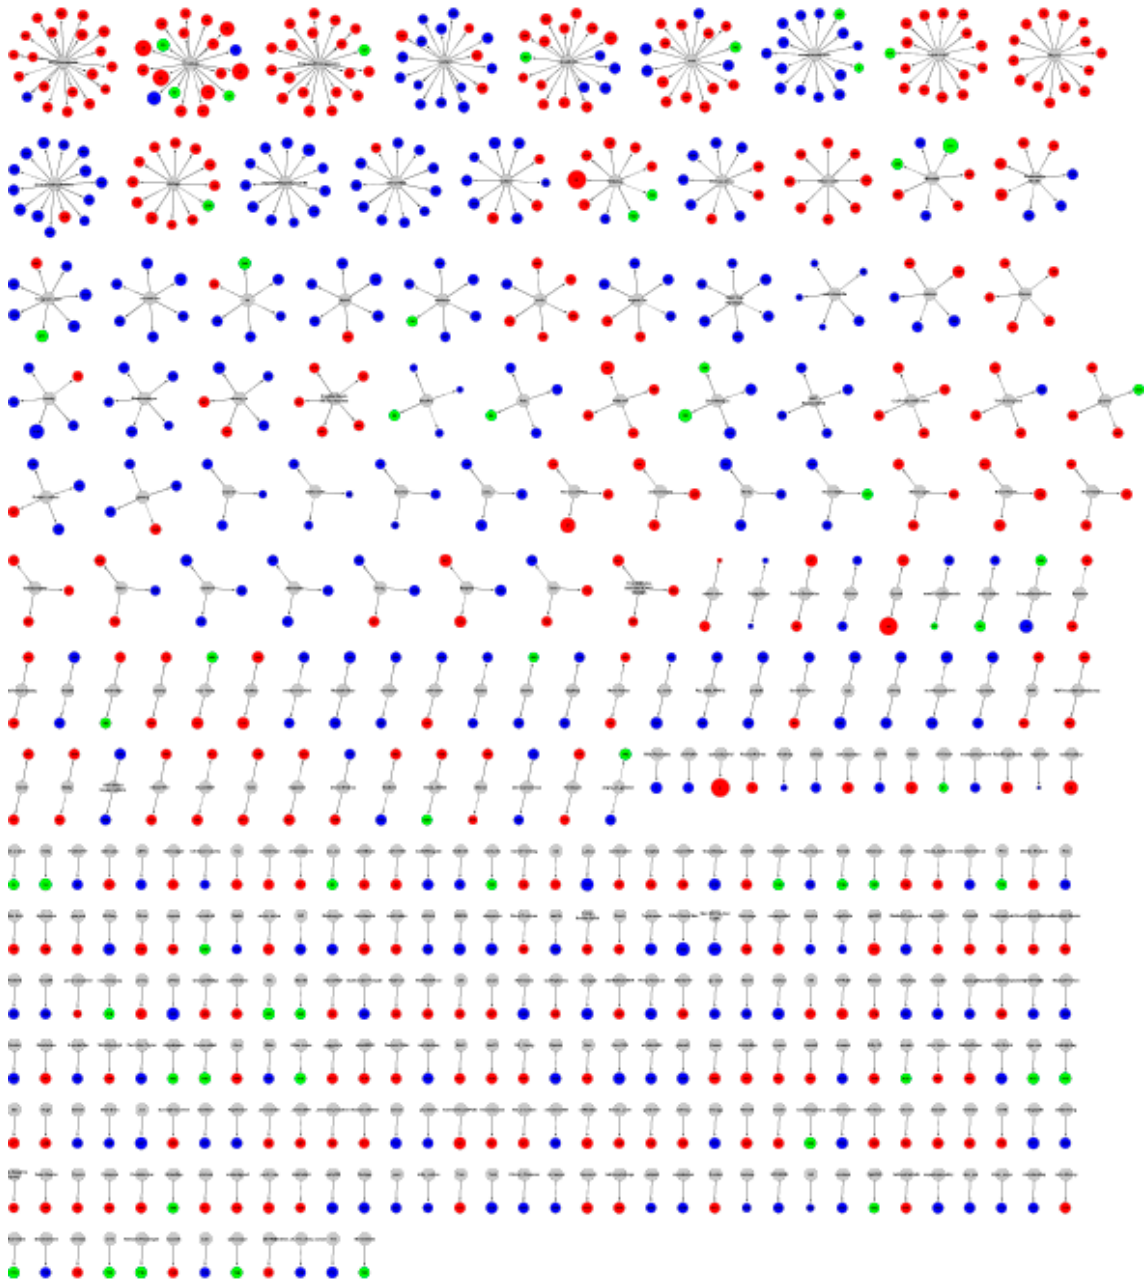

**Figure 1.** BBC Comments Organized per Person (Appendix mentioned on page 5615).

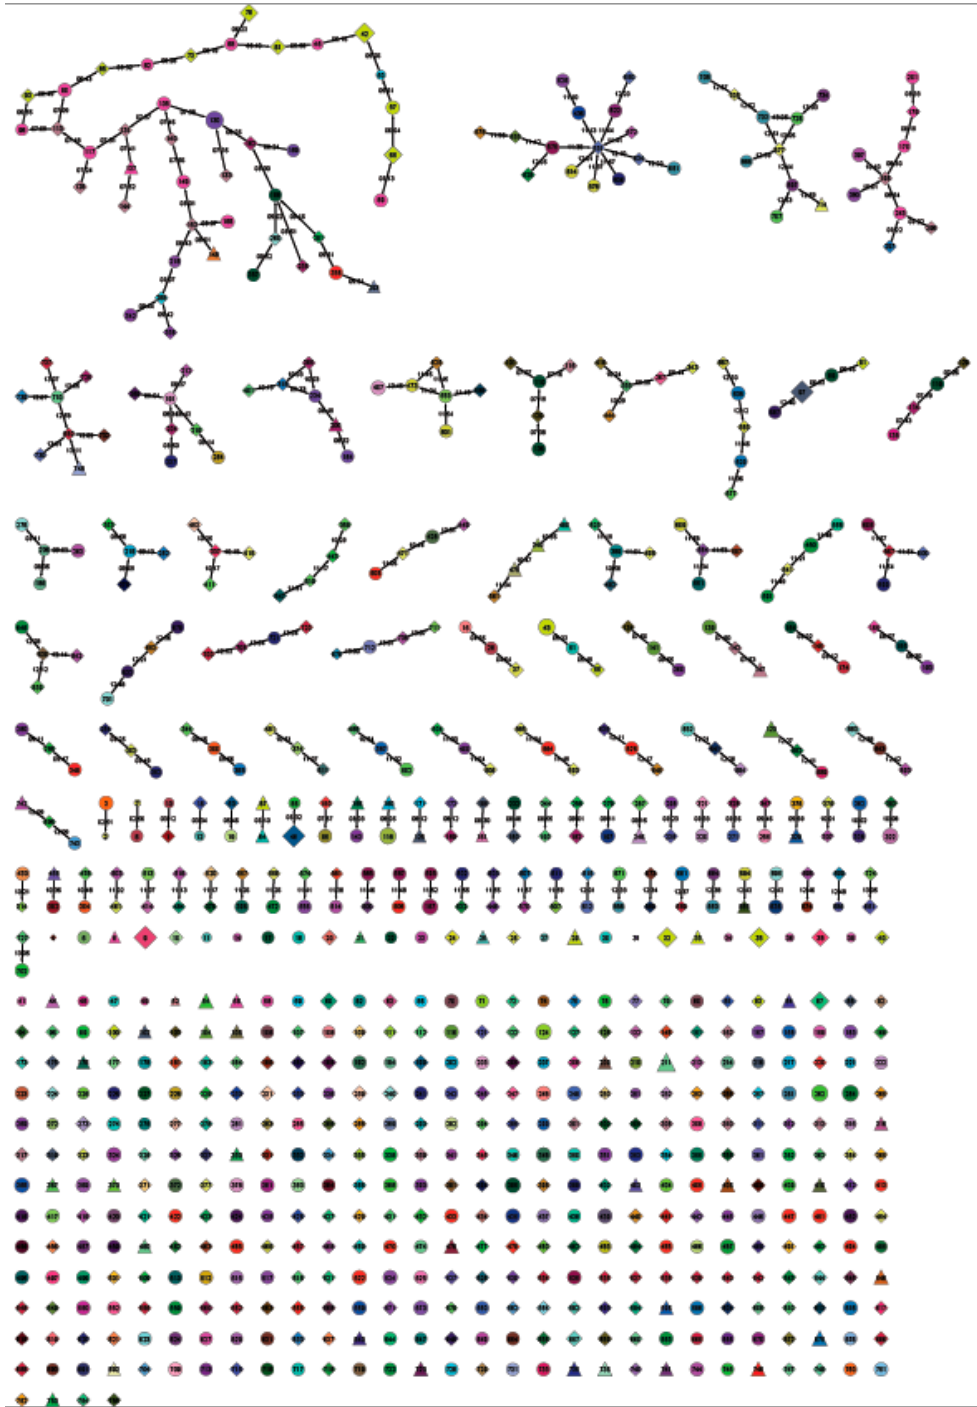

**Figure 2.** BCC-All (Appendix mentioned on page 5617).

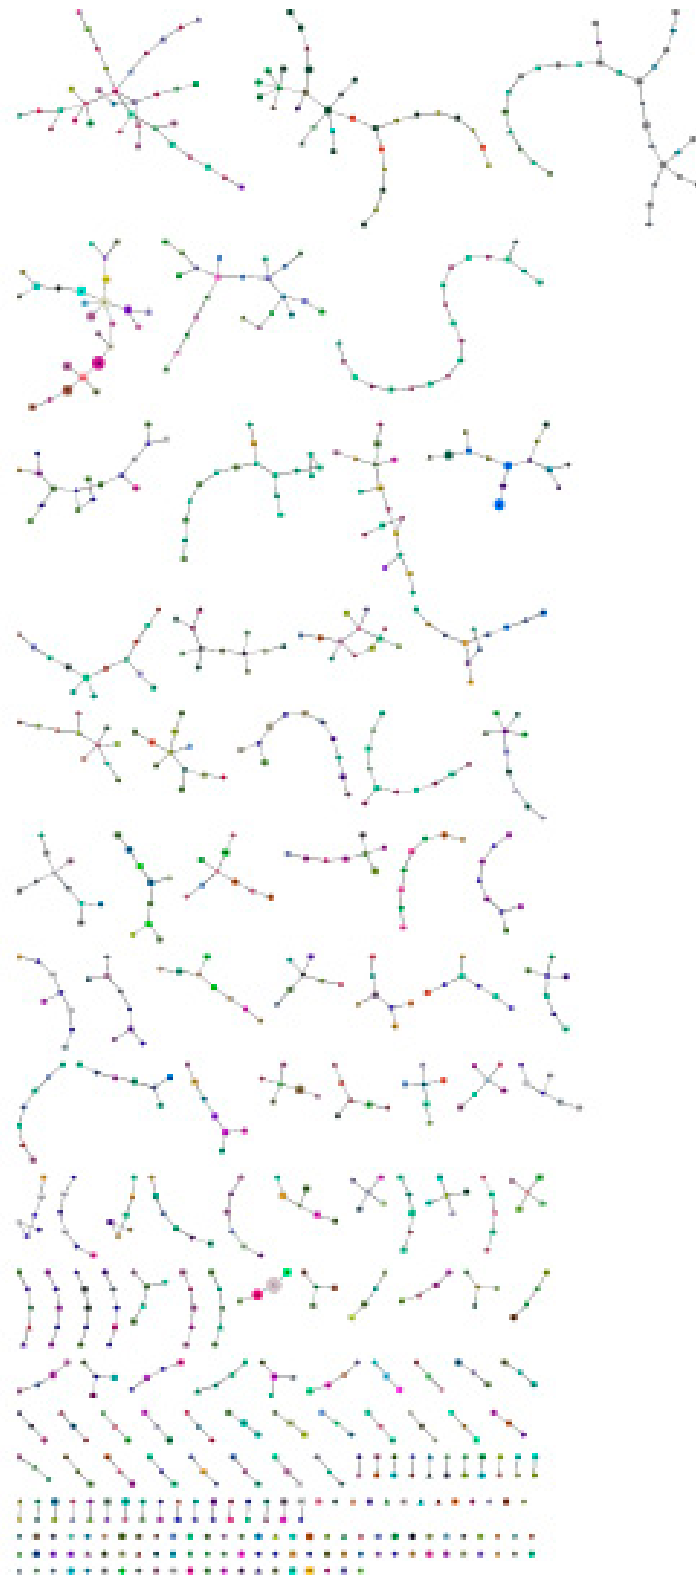

**Figure 3.** Telegraph All Comments (Appendix mentioned on page 5622).
